# Supplementary material for: Photocatalytic mineralization of anionic dyes using bismuth doped CdS–Ta2O5 composite
Source: Royal Society of Chemistry journal article supplement (doi:10.1039/c5ra09974a), 2015-01-01
Supplement: c5ra09974a1.pdf [file c5ra09974a1.pdf]

## Electronic Supplementary Information

### Photocatalytic mineralization of anionic dyes using Bismuth doped CdS-Ta<sub>2</sub>O<sub>5</sub> composite

Sachin G. Ghugal<sup>a</sup>, Suresh S. Umare<sup>\*a</sup>, Rajamma Sasikala<sup>b\*\*</sup>

<sup>a</sup>Department of Chemistry, Visvesvaraya National Institute of Technology, Nagpur 440 010, India.

<sup>b</sup>Chemistry Division, Bhabha Atomic Research Centre Trombay, Mumbai - 400 085, India.

\* Corresponding author. Tel No. +91 22 25590289; Fax: +91 22 25505151.

\*\* Corresponding author. Tel No. +91 712 2801316; Fax: +91 712 2223230.

E-mail addresses: [ssumare@chm.vnit.ac.in](mailto:ssumare@chm.vnit.ac.in) (S. S. Umare), [sasikala@barc.gov.in](mailto:sasikala@barc.gov.in) (R. Sasikala)

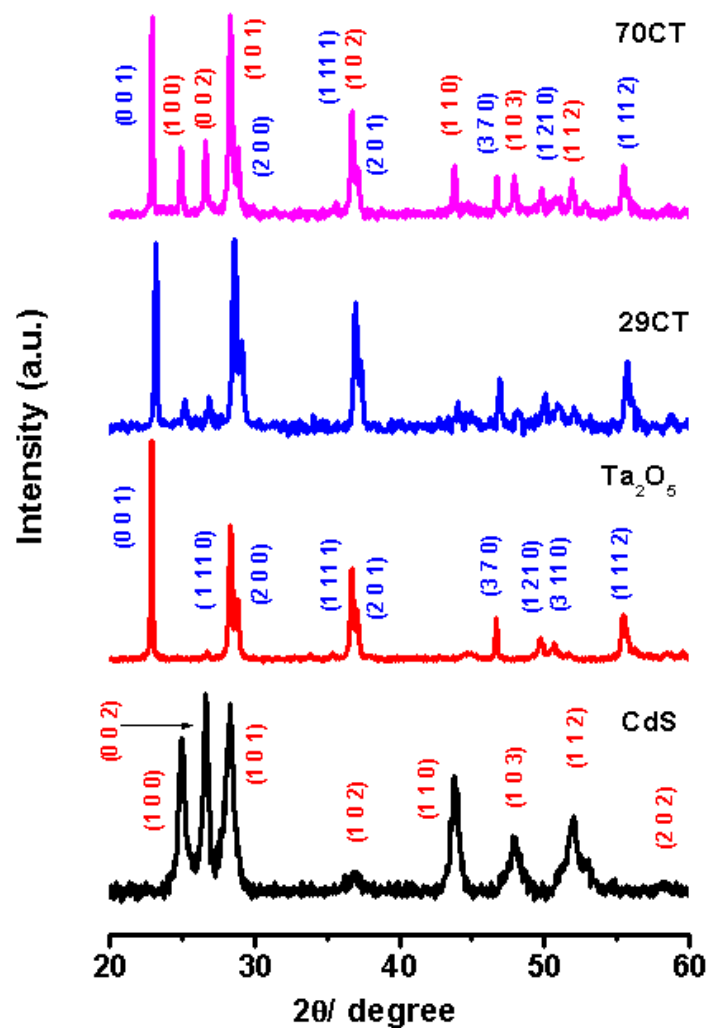

Fig. S1. XRD patterns of CdS, Ta<sub>2</sub>O<sub>5</sub>, 29CT and 70CT.

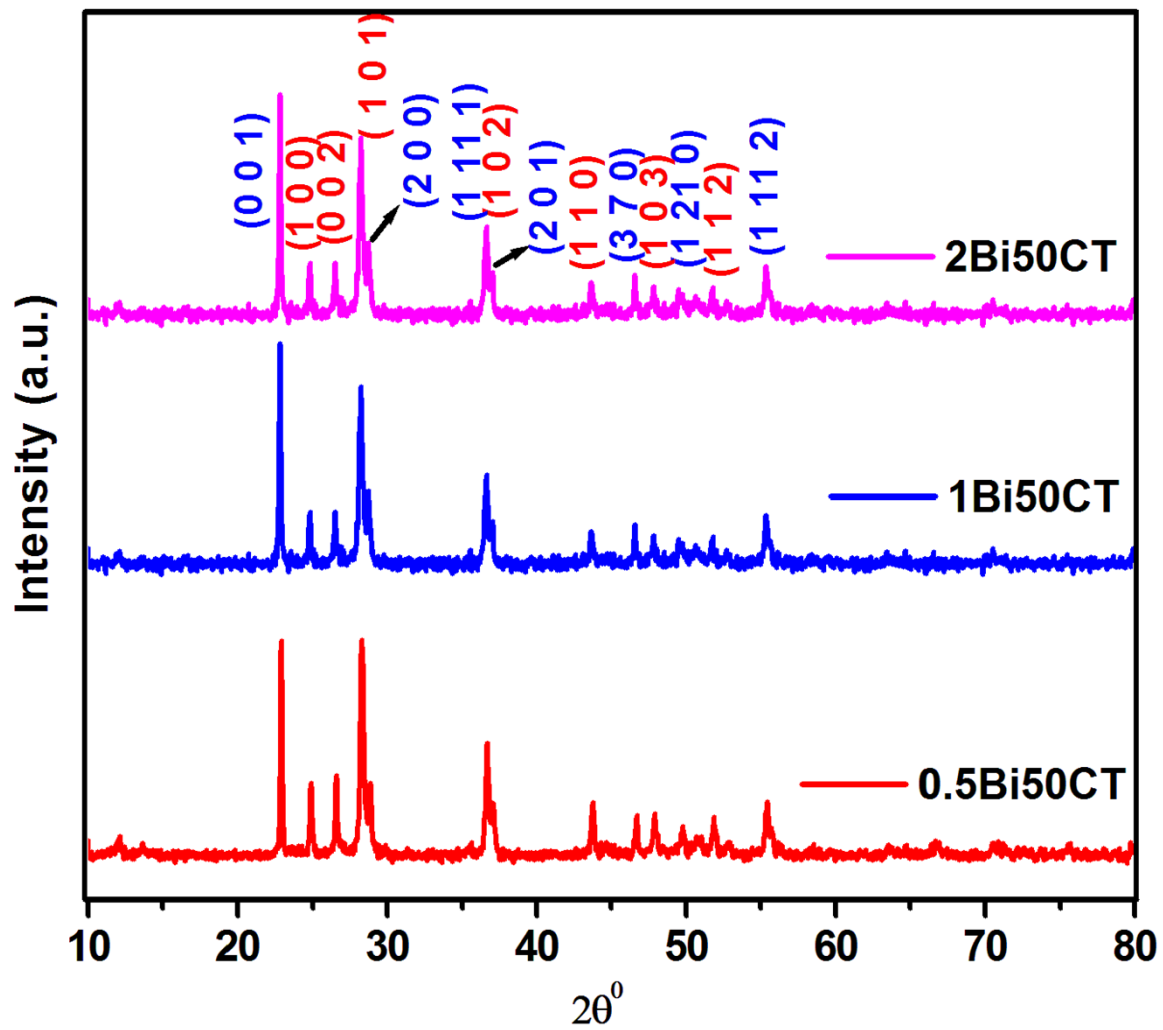

Fig. S2 XRD patterns of 0.5Bi50CT, 1Bi50CT and 2Bi50CT composites.

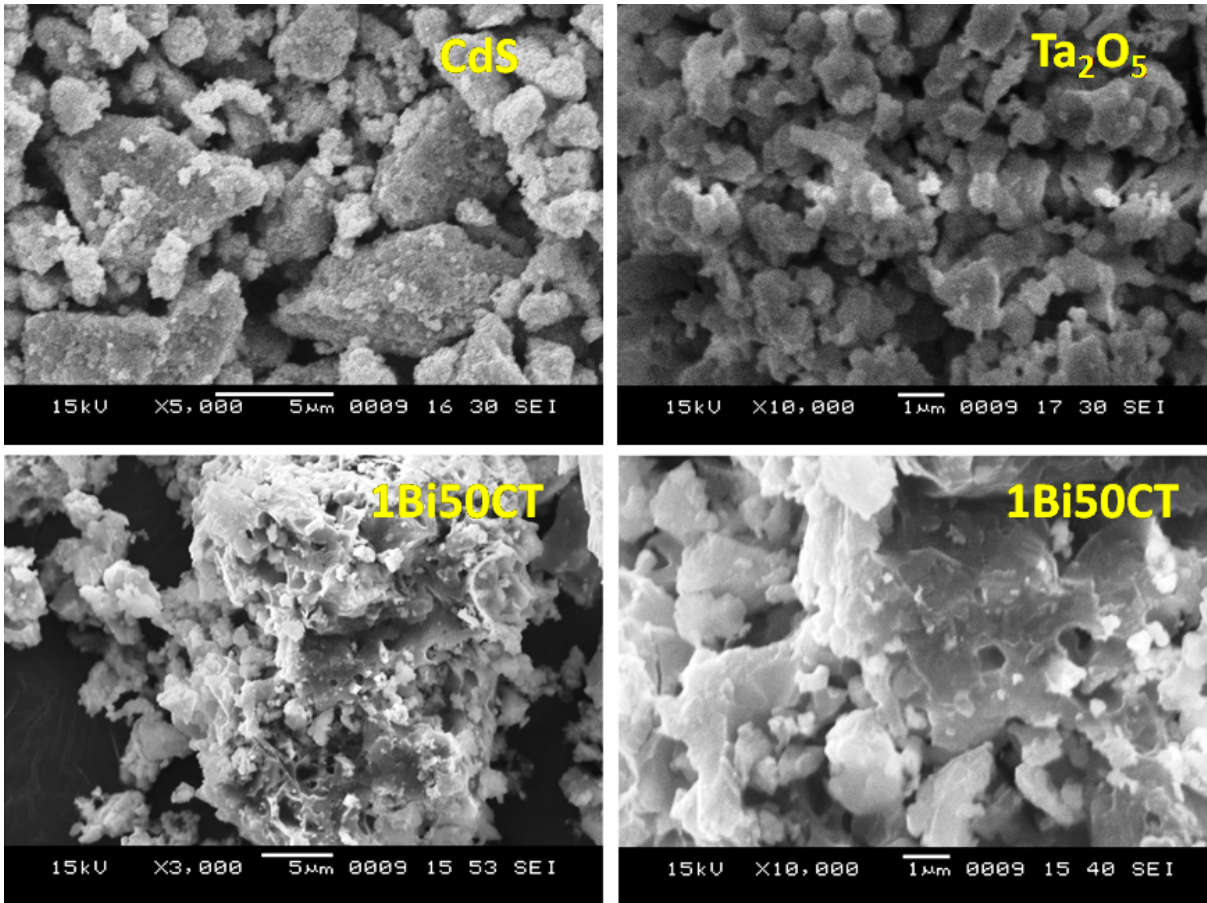

Fig. S3 SEM images of CdS, Ta<sub>2</sub>O<sub>5</sub> and 1Bi50CT.

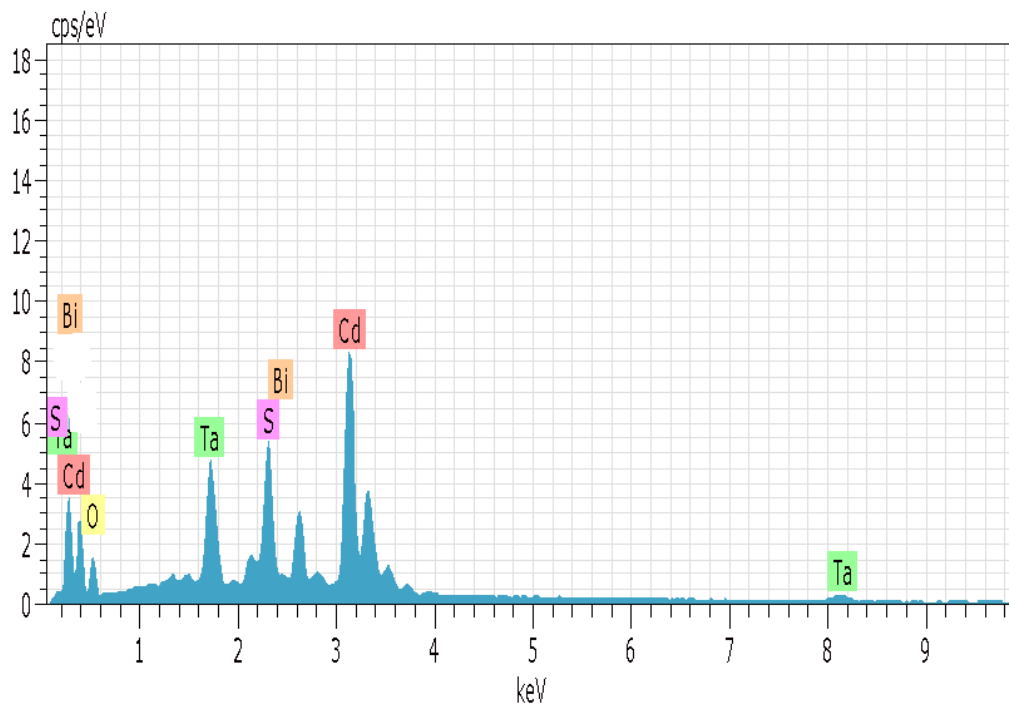

Fig. S4 EDX spectrum of 1Bi5OCT.

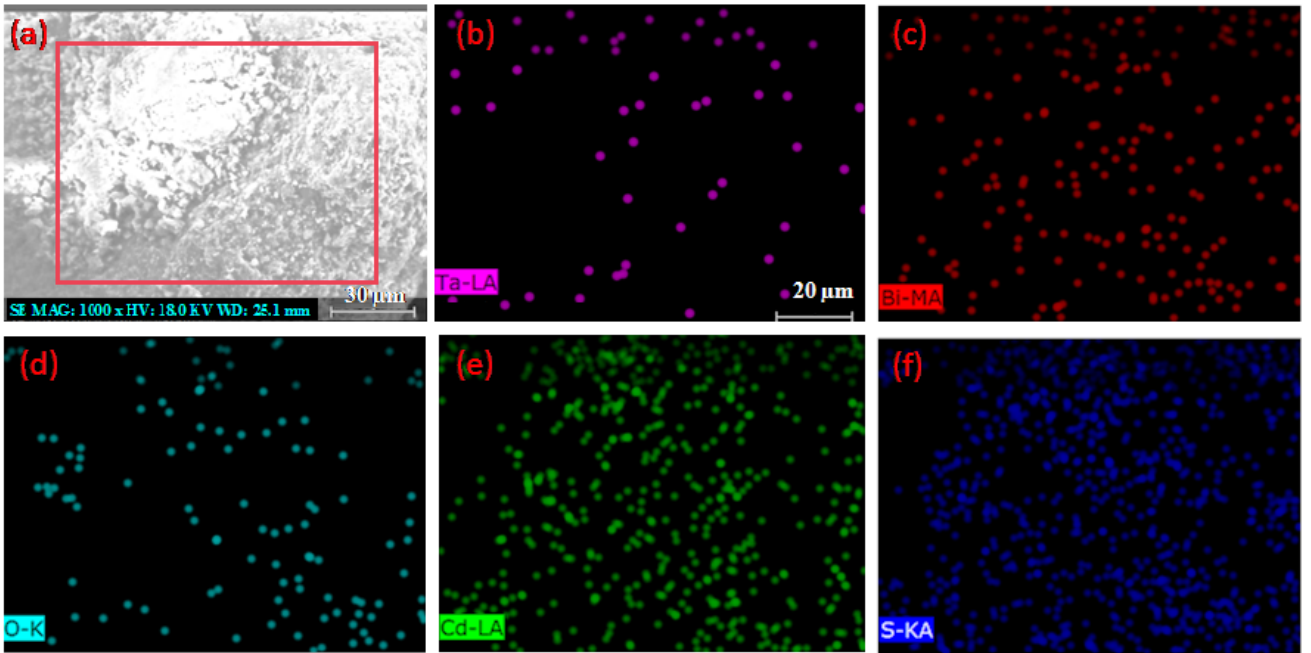

Fig: S5 (a) SEM image and EDS mapping of (b) Ta, (c) Bi, (d) O, (e) Cd and (f) S in 1Bi50CT.

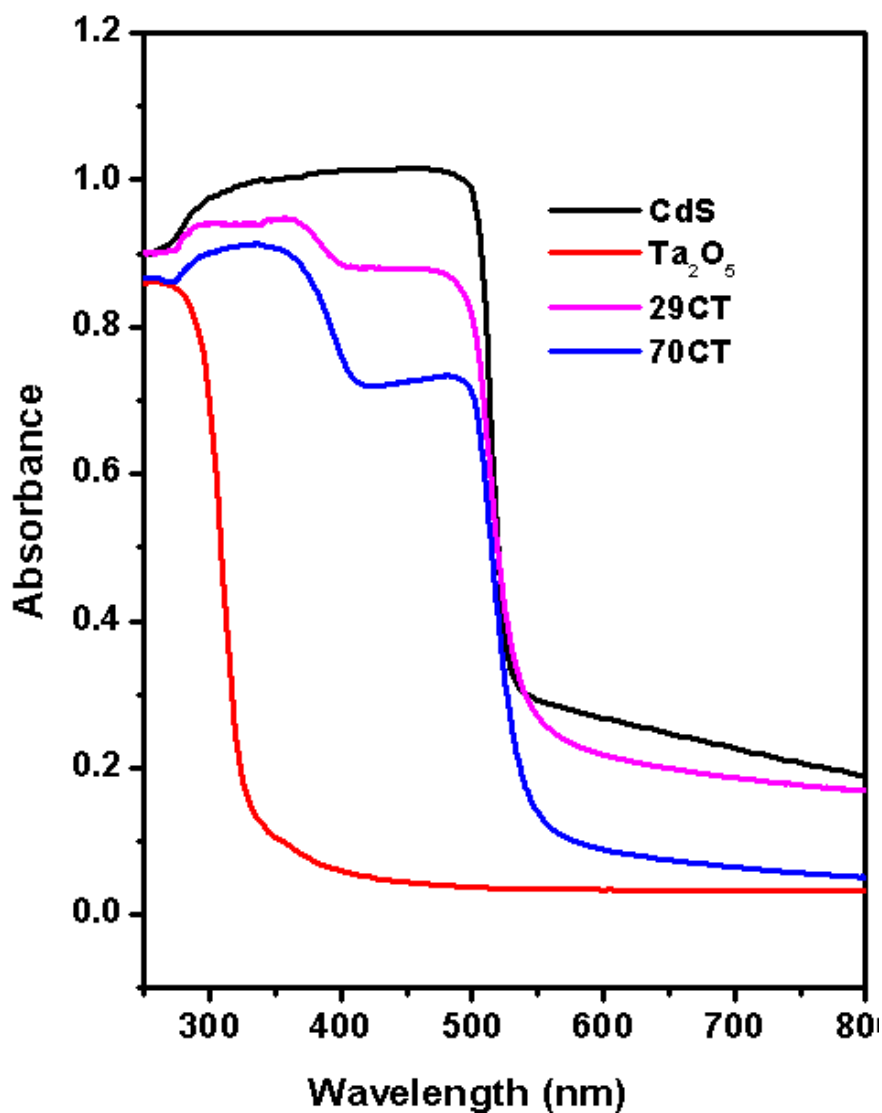

Fig. S6 UV-visible absorption spectra for CdS, Ta<sub>2</sub>O<sub>5</sub>, 29CT and 70CT.

| S.N. | Catalysts | Rate<br>k (min <sup>-1</sup> )<br>(30 min) | Degradation<br>efficiency (%)<br>(60 min) |
|------|-----------|--------------------------------------------|-------------------------------------------|
| 1.   | 0.5Bi50CT | 0.048                                      | 98.74                                     |
| 2.   | 1Bi50CT   | 0.105                                      | 99.88                                     |
| 3.   | 2Bi50CT   | 0.026                                      | 88.98                                     |

S7. Table: Kinetic Data for the photocatalytic degradation of AV 7 (50 ppm) by Bi50CT catalyst containing different Bi concentration.

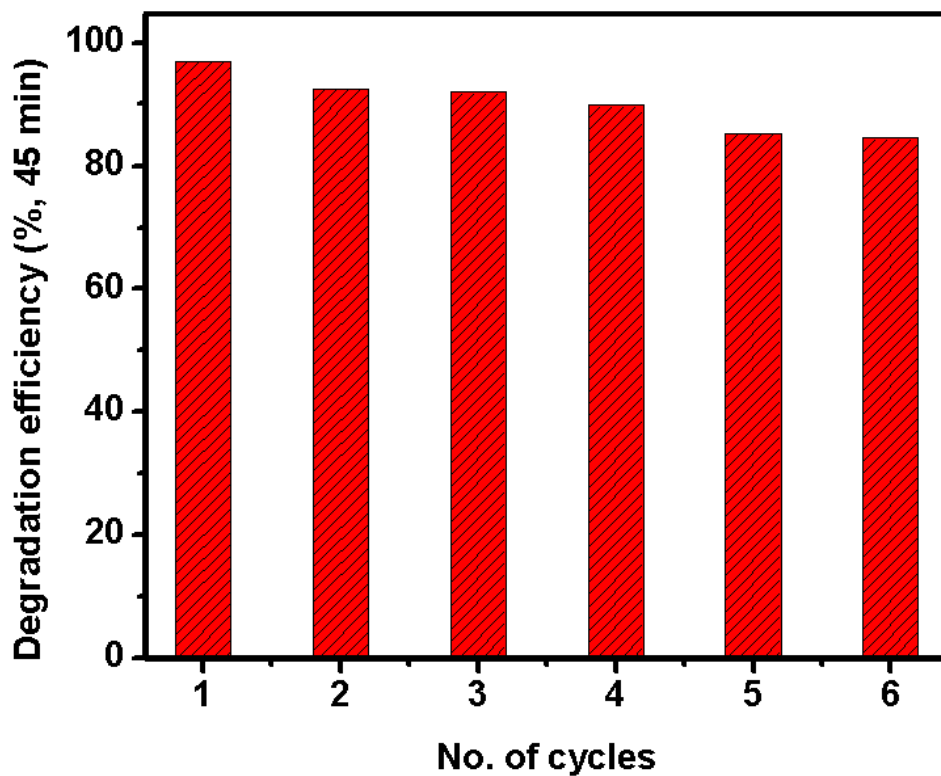

Fig. S8 Degradation efficiency (% , 45 min) of 1Bi50CT catalyst for repeated cycles.

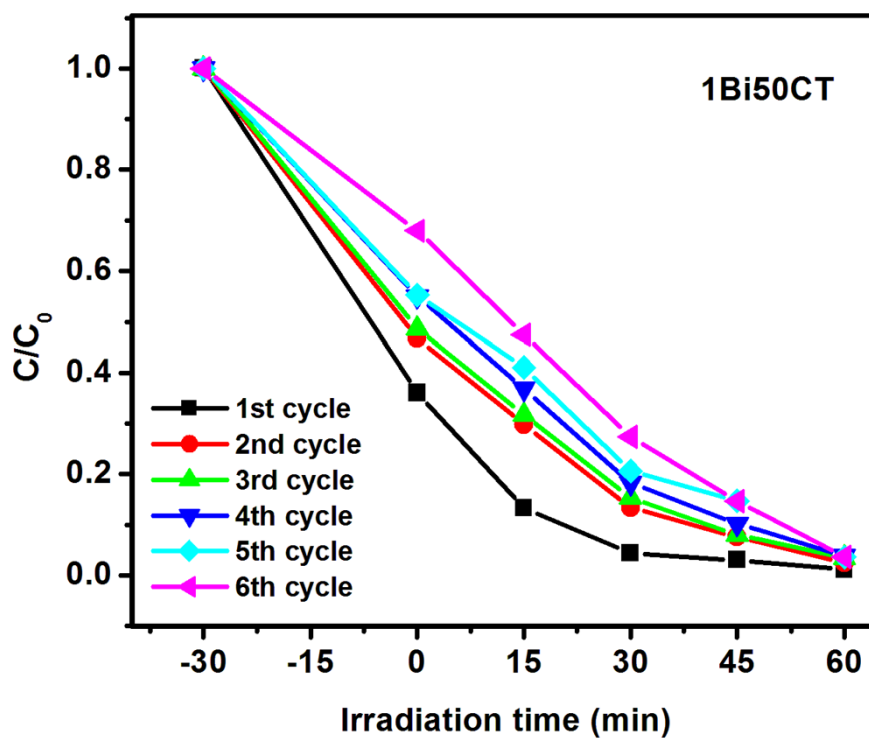

Fig. S9 Photodegradation of AV 7 (50 ppm) over 1Bi50CT for repeated cycles (six).

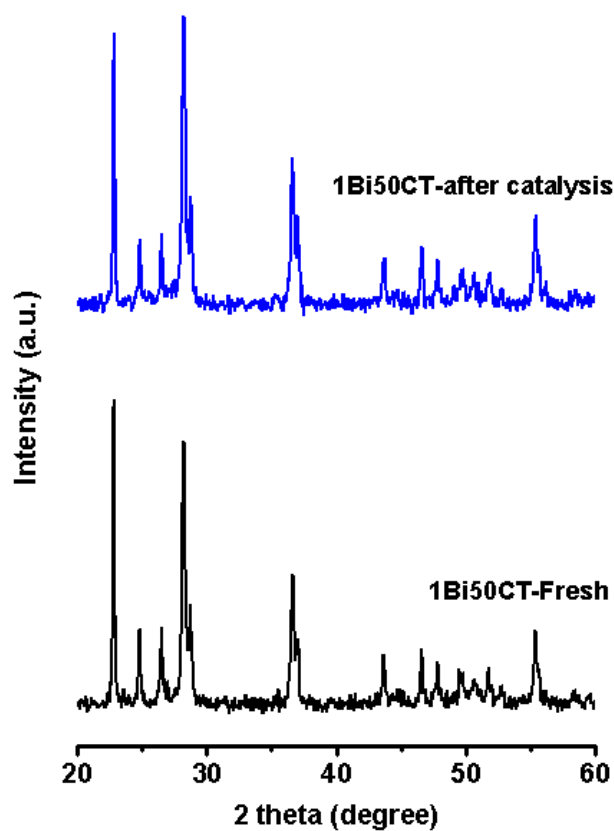

Fig. S10 XRD patterns of 1Bi50CT before and after photocatalysis.

| S.N. | Catalyst                       | Dye | Rate<br>K (min <sup>-1</sup> )<br>(30 min) | Degradation<br>efficiency (%)<br>(30 min) |
|------|--------------------------------|-----|--------------------------------------------|-------------------------------------------|
| 1.   | CdS                            | IC  | 0.107                                      | 96                                        |
| 2.   | Ta <sub>2</sub> O <sub>5</sub> | IC  | -                                          | -                                         |
| 3.   | 1Bi50CT                        | IC  | 0.112                                      | 97                                        |
| 4.   | CdS                            | MO  | 0.007                                      | 35                                        |
| 5.   | Ta <sub>2</sub> O <sub>5</sub> | MO  | -                                          | -                                         |
| 6.   | 1Bi50CT                        | MO  | 0.048                                      | 95                                        |

S11. Table: Kinetic data for the photocatalytic degradation of IC (50 ppm) and MO (20 ppm) using 1Bi50CT catalyst.
